# Supplementary material for: Altered Intestinal Production of Volatile Fatty Acids in Dogs Triggered by Lactulose and Psyllium Treatment
Source: MDPI journal article supplement (doi:10.3390/vetsci9050206), 2022-04-23
Supplement: s1 [file s1]

Supplementary

# Altered intestinal volatile fatty acid production in dogs triggered by lactulose and psyllium treatment

Máté Mackei <sup>1\*</sup>, Rebeka Talabér <sup>1</sup>, Linda Müller <sup>2</sup>, Ágnes Sterczér <sup>3</sup>, Hedvig Fébel <sup>4</sup>, Zsuzsanna Neogrády <sup>1</sup> and Gábor Mátis <sup>1</sup>

<sup>1</sup> Division of Biochemistry, Department of Physiology and Biochemistry, University of Veterinary Medicine, István street 2, H-1078 Budapest, Hungary

<sup>2</sup> Department of Obstetrics and Food Animal Medicine Clinic, University of Veterinary Medicine, István street 2, H-1078 Budapest, Hungary

<sup>3</sup> Department and Clinic of Internal Medicine, University of Veterinary Medicine, István street 2, H-1078 Budapest, Hungary

<sup>4</sup> Nutrition Physiology Research Group, Institute of Physiology and Nutrition, Kaposvár Campus, Hungarian University of Agriculture and Life Sciences, Gesztenyés street 1, H-2053 Herceghalom, Hungary

\* Correspondence: mackei.mate@univet.hu

| Animal ID | Sex    | Body weight (kg) | Age (months) | Treatment |
|-----------|--------|------------------|--------------|-----------|
| 1         | male   | 17.2             | 59           | Lactulose |
| 2         | male   | 15.5             | 59           | Lactulose |
| 3         | male   | 17.3             | 34           | Lactulose |
| 4         | male   | 16               | 28           | Lactulose |
| 5         | male   | 16.8             | 28           | Lactulose |
| 6         | male   | 15.2             | 28           | Lactulose |
| 7         | male   | 16.5             | 70           | Lactulose |
| 8         | male   | 19               | 35           | Lactulose |
| 9         | male   | 15.5             | 59           | Lactulose |
| 10        | male   | 15.6             | 37           | Lactulose |
| 11        | male   | 16.5             | 60           | Psyllium  |
| 12        | male   | 14.4             | 38           | Psyllium  |
| 13        | male   | 15.2             | 38           | Psyllium  |
| 14        | male   | 11.5             | 38           | Psyllium  |
| 15        | male   | 15.9             | 37           | Psyllium  |
| 16        | male   | 12.8             | 37           | Psyllium  |
| 17        | male   | 14.4             | 59           | Psyllium  |
| 18        | male   | 14.5             | 37           | Psyllium  |
| 19        | male   | 10.9             | 38           | Psyllium  |
| 20        | male   | 13.5             | 71           | Psyllium  |
| 21        | female | 17               | 71           | Lactulose |
| 22        | female | 14.3             | 71           | Lactulose |

|    |        |      |    |           |
|----|--------|------|----|-----------|
| 23 | female | 13.8 | 27 | Lactulose |
| 24 | female | 14.1 | 28 | Lactulose |
| 25 | female | 12.9 | 27 | Lactulose |
| 26 | female | 17.8 | 66 | Psyllium  |
| 27 | female | 15.8 | 71 | Psyllium  |
| 28 | female | 15.9 | 70 | Psyllium  |
| 29 | female | 13   | 70 | Psyllium  |
| 30 | female | 12   | 71 | Psyllium  |

**Table S1:** Age, sex and weight of the animals, involved in the study

| Animal ID        | WBC                  | NEU                  | LYM                  | MON                  | EO                   | BASO                 | RBC                   | HGB     | HCT       | MCV       | MCH       | PLT                  |
|------------------|----------------------|----------------------|----------------------|----------------------|----------------------|----------------------|-----------------------|---------|-----------|-----------|-----------|----------------------|
|                  | [10 <sup>9</sup> /L] | [10 <sup>12</sup> /L] | [g/L]   | [L/L]     | [fL]      | [pg]      | [10 <sup>9</sup> /L] |
| Reference values | 7.2-21.9             | 3.8-14.2             | 1.9-6.3              | 0.4-2.1              | <2.45                | <0.09                | 5.53-8.20             | 127-190 | 0.37-0.53 | 60.1-71.6 | 21.7-24.4 | 156-582              |
| 1                | 17.37                | 8.34                 | 4.74                 | 1.63                 | 2.61                 | 0.05                 | 7.06                  | 154     | 0.42      | 59.3      | 21.8      | 396                  |
| 2                | 10.85                | 6.11                 | 3.63                 | 0.77                 | 0.32                 | 0.02                 | 7.4                   | 175     | 0.49      | 65.8      | 23.6      | 259                  |
| 3                | 11.45                | 5.6                  | 4.45                 | 0.54                 | 0.85                 | 0.01                 | 7.94                  | 191     | 0.52      | 65.2      | 24.1      | 243                  |
| 4                | 11                   | 5.86                 | 3.56                 | 0.82                 | 0.74                 | 0.02                 | 7.74                  | 173     | 0.47      | 60.5      | 22.4      | 298                  |
| 5                | 12.29                | 7.4                  | 3.12                 | 0.81                 | 0.93                 | 0.03                 | 7.37                  | 174     | 0.48      | 64.5      | 23.6      | 298                  |
| 6                | 11.43                | 6.1                  | 4.30                 | 0.58                 | 0.42                 | 0.03                 | 7.97                  | 189     | 0.50      | 63.1      | 23.7      | 324                  |
| 7                | 10.46                | 5.92                 | 2.96                 | 0.89                 | 0.68                 | 0.01                 | 6.72                  | 156     | 0.44      | 65.0      | 23.2      | 411                  |
| 8                | 10.01                | 4.99                 | 4.01                 | 0.74                 | 0.25                 | 0.02                 | 7.68                  | 187     | 0.49      | 64.2      | 24.3      | 283                  |
| 9                | 11.27                | 7.13                 | 3.01                 | 0.77                 | 0.33                 | 0.03                 | 7.08                  | 168     | 0.46      | 64.4      | 23.7      | 345                  |
| 10               | 14.93                | 9.67                 | 4.05                 | 0.6                  | 0.59                 | 0.02                 | 7.17                  | 170     | 0.46      | 64.4      | 23.7      | 397                  |
| 11               | 9.21                 | 5.39                 | 2.55                 | 0.52                 | 0.73                 | 0.02                 | 7.79                  | 189     | 0.51      | 65        | 24.3      | 195                  |
| 12               | 10.86                | 7.79                 | 2.07                 | 0.55                 | 0.44                 | 0.01                 | 6.6                   | 158     | 0.43      | 65.6      | 23.9      | 360                  |
| 13               | 19.46                | 12.63                | 4.06                 | 1.4                  | 1.33                 | 0.04                 | 6.24                  | 148     | 0.4       | 64.6      | 23.7      | 469                  |
| 14               | 12.78                | 6.61                 | 3.25                 | 0.96                 | 1.93                 | 0.03                 | 7.05                  | 166     | 0.44      | 62.6      | 23.5      | 304                  |
| 15               | 12.95                | 8.84                 | 2.7                  | 0.75                 | 0.64                 | 0.02                 | 6.55                  | 168     | 0.46      | 70.5      | 25.6      | 377                  |
| 16               | 12.55                | 7.73                 | 2.47                 | 0.55                 | 1.77                 | 0.03                 | 7.77                  | 181     | 0.48      | 61.4      | 23.3      | 336                  |
| 17               | 18.4                 | 14.15                | 2.87                 | 0.84                 | 0.53                 | 0.01                 | 7.13                  | 174     | 0.46      | 65.1      | 24.4      | 445                  |
| 18               | 15.36                | 11.28                | 2.81                 | 1.06                 | 0.19                 | 0.02                 | 7.82                  | 181     | 0.48      | 60.9      | 23.1      | 432                  |
| 19               | 11.72                | 7.7                  | 2.75                 | 0.81                 | 0.4                  | 0.06                 | 7.01                  | 166     | 0.45      | 63.5      | 23.7      | 437                  |
| 20               | 10.35                | 6.05                 | 2.52                 | 0.79                 | 0.94                 | 0.05                 | 7.06                  | 168     | 0.47      | 66.9      | 23.8      | 554                  |
| 21               | 12.47                | 7.46                 | 3.85                 | 0.67                 | 0.48                 | 0.01                 | 7.05                  | 157     | 0.43      | 61.3      | 22.3      | 491                  |
| 22               | 11.41                | 6.31                 | 4.24                 | 0.65                 | 0.18                 | 0.03                 | 8.6                   | 193     | 0.51      | 59.2      | 22.4      | 407                  |
| 23               | 11.62                | 6.69                 | 4.01                 | 0.59                 | 0.3                  | 0.03                 | 7.19                  | 170     | 0.46      | 63.7      | 23.6      | 302                  |
| 24               | 15.42                | 7.28                 | 4.76                 | 0.86                 | 2.49                 | 0.03                 | 7                     | 164     | 0.44      | 63.3      | 23.4      | 438                  |
| 25               | 14.7                 | 8.02                 | 3.29                 | 0.54                 | 2.83                 | 0.02                 | 7.62                  | 175     | 0.48      | 62.6      | 23        | 325                  |
| 26               | 9.88                 | 5.9                  | 2.42                 | 0.57                 | 0.98                 | 0.01                 | 7.11                  | 168     | 0.46      | 64.8      | 23.6      | 314                  |
| 27               | 9.33                 | 6.44                 | 2.07                 | 0.4                  | 0.41                 | 0.01                 | 8.41                  | 197     | 0.54      | 63.9      | 23.4      | 432                  |
| 28               | 9.51                 | 5.76                 | 1.82                 | 0.42                 | 1.5                  | 0.01                 | 8.78                  | 210     | 0.57      | 65.4      | 23.9      | 260                  |

|    |       |      |      |      |      |      |      |     |      |      |      |     |
|----|-------|------|------|------|------|------|------|-----|------|------|------|-----|
| 29 | 8.01  | 5.36 | 1.93 | 0.3  | 0.41 | 0.01 | 6.64 | 153 | 0.42 | 62.5 | 23   | 458 |
| 30 | 11.39 | 6.83 | 3.13 | 0.64 | 0.77 | 0.02 | 7.11 | 163 | 0.44 | 61.5 | 22.9 | 441 |

**Table S2.** Haematological parameters of the dogs. The top row shows the reference values for healthy animals. WBC= white blood cells, NEU= neutrophil granulocytes, LYM= lymphocytes, MON= monocytes, EO= eosinophil granulocytes, BASO= basophil granulocytes, RBC= red blood cells, HGB= haemoglobin, HCT= haematocrit, MCV= mean red cell volume, MCH= mean haemoglobin content of red cells, PLT= platelets.

| Animal ID        | ALT    | LIP    | GGT     | TG        | CREA      | ALB   | TPROT |
|------------------|--------|--------|---------|-----------|-----------|-------|-------|
|                  | [IU/L] | [IU/L] | [IU/L]  | [mmol/L]  | [μmol/L]  | [g/L] | [g/L] |
| Reference values | 23-147 | <150   | 2.3-9.1 | 0.18-0.89 | 33.5-76.3 | 27-35 | 50-65 |
| 1                | 23.4   | 70     | 4       | 0.48      | 70        | 27.6  | 57.8  |
| 2                | 33.9   | 154    | 5.3     | 0.84      | 48        | 30.6  | 60.7  |
| 3                | 51.6   | 26     | 4       | 0.77      | 81.5      | 32.6  | 61.5  |
| 4                | 43.4   | 41     | 4.4     | 0.68      | 61.1      | 32.9  | 59.6  |
| 5                | 64.5   | 42     | 3       | 0.7       | 53.5      | 33    | 60.2  |
| 6                | 42.1   | 65     | 4.6     | 0.75      | 64.5      | 31.1  | 58.9  |
| 7                | 39     | 30     | 3.6     | 0.83      | 59.4      | 28.6  | 66.7  |
| 8                | 45.1   | 71     | 6.1     | 0.78      | 65.8      | 33.7  | 58.6  |
| 9                | 35.3   | 121    | 4.6     | 0.61      | 48.2      | 30.4  | 57.4  |
| 10               | 33     | 76     | 4.5     | 0.42      | 66.4      | 31.2  | 57.5  |
| 11               | 132.6  | 37     | 3.5     | 0.43      | 65.7      | 33.3  | 61.6  |
| 12               | 54.6   | 54     | 4.6     | 0.64      | 57.7      | 29.9  | 57.2  |
| 13               | 164.5  | 46     | 3.3     | 0.5       | 53.8      | 30.7  | 56.2  |
| 14               | 48.9   | 93     | 4.8     | 0.31      | 51.7      | 31.1  | 58.3  |
| 15               | 51     | 26     | 3.4     | 0.41      | 68.2      | 32.6  | 60.9  |
| 16               | 99     | 58     | 3.8     | 0.49      | 61.1      | 32.5  | 63.1  |
| 17               | 63.8   | 32     | 2.4     | 0.41      | 40.2      | 33.3  | 62    |
| 18               | 52     | 36     | 2.6     | 0.47      | 57.1      | 33.1  | 60.5  |
| 19               | 31.2   | 46     | 5.1     | 0.44      | 59.9      | 32.3  | 56.3  |
| 20               | 61.7   | 69     | 2.5     | 0.5       | 49        | 30.8  | 59.1  |
| 21               | 25.6   | 111    | 4.7     | 0.76      | 46.8      | 32.7  | 60    |
| 22               | 38.4   | 141    | 4       | 0.63      | 43.9      | 33.9  | 66    |
| 23               | 36.1   | 93     | 3.3     | 0.55      | 39.8      | 33.8  | 60    |
| 24               | 62.6   | 97     | 4.3     | 0.54      | 47.4      | 31.6  | 57.8  |
| 25               | 34.9   | 52     | 3.8     | 0.56      | 53.9      | 32.4  | 56.2  |
| 26               | 44.5   | 82     | 5.2     | 0.62      | 48.8      | 29.7  | 61.7  |
| 27               | 80.6   | 52     | 5.7     | 0.83      | 56.7      | 34    | 66    |
| 28               | 84     | 127    | 3.2     | 0.48      | 41.9      | 31.8  | 62.4  |
| 29               | 56     | 59     | 2.9     | 0.58      | 57.2      | 32    | 61.3  |
| 30               | 70.5   | 95     | 2.9     | 0.77      | 50.4      | 31.7  | 63.4  |

**Table S3:** Biochemical parameters of the dogs. The top row shows the reference values for healthy animals. ALT= alanine aminotransferase, LIP= lipase, GGT= gamma-glutamyl transferase, TG= triglyceride, CREA= creatinine, ALB= albumin, TPROT= total protein

**Figure S1.** Violin plots show the concentration of isobutyrate in the faecal samples following lactulose (A) and psyllium (B) treatment measured by GC-MS method. Data have been visualized using violin plots. Concentration of single samples are plotted as grey dots; black line refers to the median and grey lines refer to first and third quartiles.

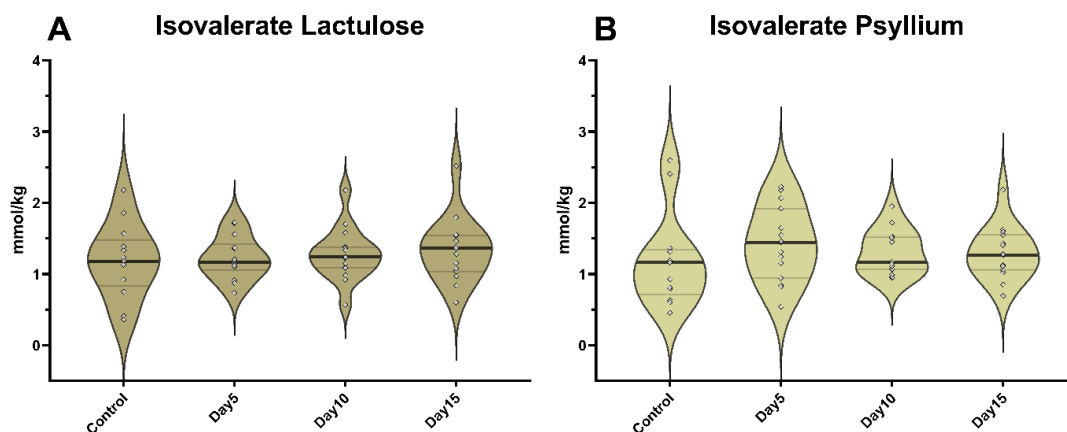

**Figure S2.** Violin plots show the concentration of isovalerate in the faecal samples following lactulose (A) and psyllium (B) treatment measured by GC-MS method. Data have been visualized using violin plots. Concentration of single samples are plotted as grey dots; black line refers to the median and grey lines refer to first and third quartiles.

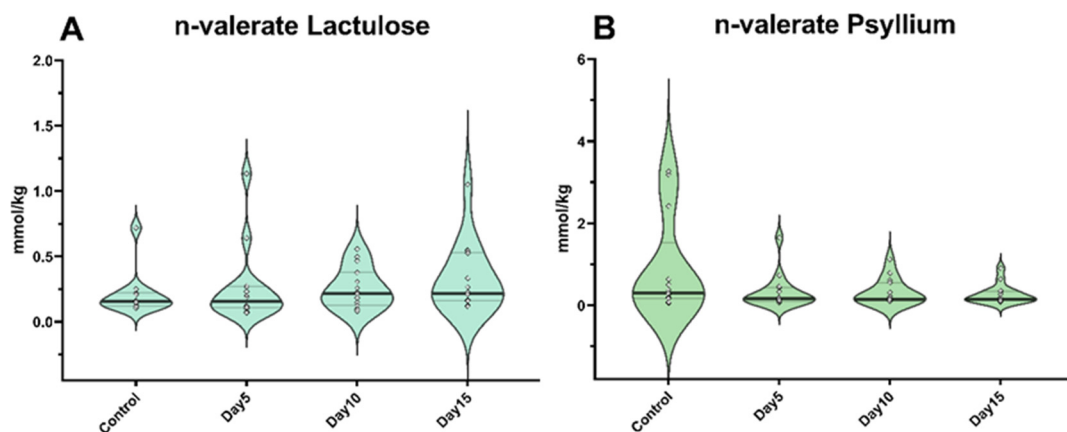

**Figure S3.** Violin plots show the concentration of n-valerate in the faecal samples following lactulose (A) and psyllium (B) treatment measured by GC-MS method. Data have been visualized using violin plots. Concentration of single samples are plotted as grey dots; black line refers to the median and lines refer to first and third quartiles.
